# Supplementary material for: Predation shapes the evolutionary traits of cervid weapons
Source: Springer Nature journal article supplement (doi:10.1038/s41559-018-0657-5), 2018-08-30
Supplement: 41559_2018_657_MOESM1_ESM.pdf [file 41559_2018_657_MOESM1_ESM.pdf]

In the format provided by the authors and unedited.

# Predation shapes the evolutionary traits of cervid weapons

Matthew C. Metz <sup>1,2\*</sup>, Douglas J. Emlen<sup>3</sup>, Daniel R. Stahler<sup>2</sup>, Daniel R. MacNulty<sup>4</sup>, Douglas W. Smith<sup>2</sup> and Mark Hebblewhite <sup>1</sup>

---

<sup>1</sup>Wildlife Biology Program, Department of Ecosystem and Conservation Sciences, W. A. Franke College of Forestry and Conservation, University of Montana, Missoula, MT, USA. <sup>2</sup>Yellowstone Wolf Project, Yellowstone Center for Resources, Yellowstone National Park, WY, USA. <sup>3</sup>Division of Biological Sciences, University of Montana, Missoula, MT, USA. <sup>4</sup>Department of Wildland Resources and Ecology Center, Utah State University, Logan, UT, USA.  
\*e-mail: [matthew.metz@umontana.edu](mailto:matthew.metz@umontana.edu)

# **Predation shapes the evolutionary traits of cervid weapons**

Matthew C. Metz<sup>1,2\*</sup>, Douglas J. Emlen<sup>3</sup>, Daniel R. Stahler<sup>2</sup>, Daniel R. MacNulty<sup>4</sup>,  
Douglas W. Smith<sup>2</sup>, Mark Hebblewhite<sup>1</sup>

<sup>1</sup>Wildlife Biology Program, Department of Ecosystem and Conservation Sciences, W.A. Franke College of Forestry and Conservation, University of Montana, Missoula, MT, USA

<sup>2</sup>Yellowstone Wolf Project, Yellowstone Center for Resources, Yellowstone National Park, WY, USA

<sup>3</sup>Division of Biological Sciences, University of Montana, Missoula, MT, USA

<sup>4</sup>Department of Wildland Resources and Ecology Center, Utah State University, Logan, UT, USA

\*email: [matthew.metz@umontana.edu](mailto:matthew.metz@umontana.edu)

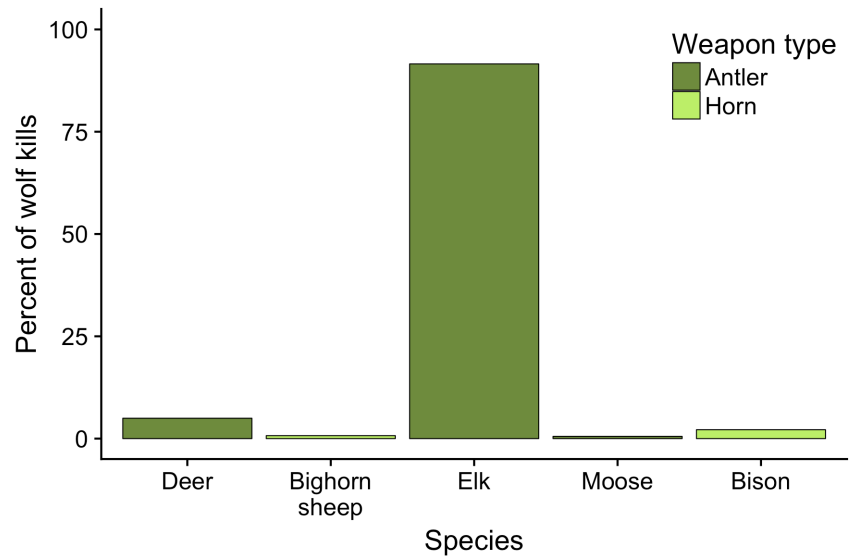

**Supplementary Figure 1. Percent of wolf-killed ungulates in northern Yellowstone during winter.** Percent of each species calculated from 1,104 wolf-killed ungulates detected during 30-day early (mid-November to mid-December) and late (March) winter monitoring periods from November 2003 – March 2016.

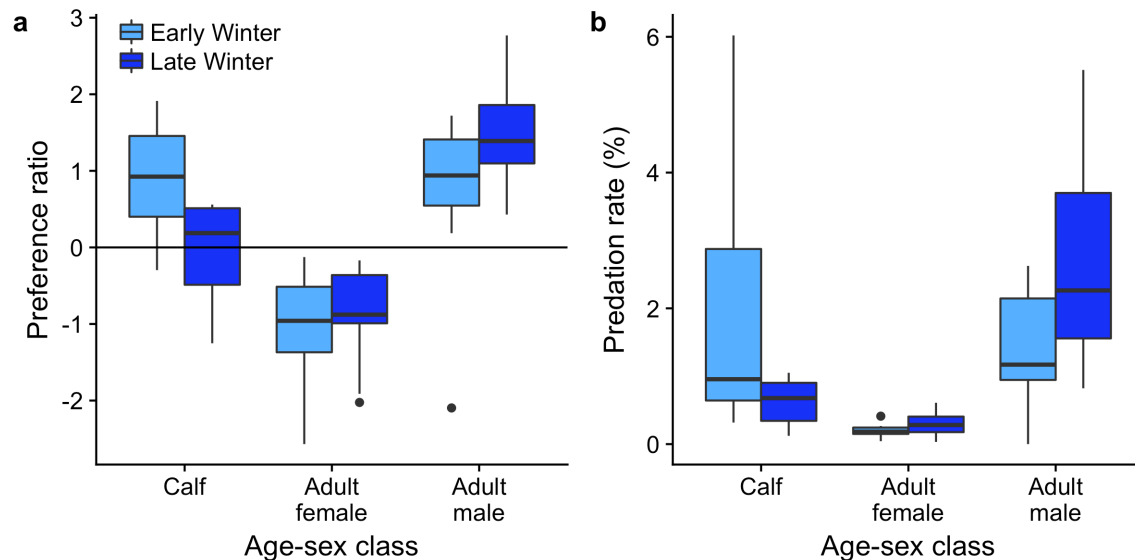

**Supplementary Figure 2. Wolf preference ratio and predation rate in northern**

**Yellowstone. a,** Wolf preference ratio (equation (1) in *Methods*) for elk calves, adult females, and adult males. **b,** Wolf predation rate on elk calves, adult females, and adult males (number of age-sex specific kills divided by age-sex specific elk abundance). Each panel displays a box plot of annual estimates from 30-day study periods<sup>1</sup>, November 2003 – March 2016 (no estimates for four years because elk age-sex surveys did not occur). Wolf predation statistics use data about wolf kill composition and kill rate from three wolf packs that were intensively monitored by aerial and ground-based observations during each study period ( $n = 14$  total packs)<sup>2</sup>. These wolf predation statistics include only wolf kills detected by aerial and ground-based observations and do not correct for variation in detection probability among wolf kills of differing size<sup>2,3</sup>. Wolf abundance estimates are for resident northern Yellowstone National Park wolves during early and late winter. Total elk abundance was estimated as described in *Methods*<sup>4</sup>, while the age-sex composition of the elk population was determined during a late winter population-wide survey conducted by the Northern Yellowstone Cooperative Wildlife Working Group<sup>1</sup>. The specific equation used in panel **b** was *total northern YNP wolf abundance x wolf kill rate on elk x proportion age-sex class among detected wolf-killed elk*, divided by *abundance of age-sex class elk for northern Yellowstone*. The box plots display the median, as well as the first and third quartiles. Whiskers extend from the inter-quartile range to the largest value that is no further than  $1.5 \times$  inter-quartile range, in each direction. Filled circles represent outliers.

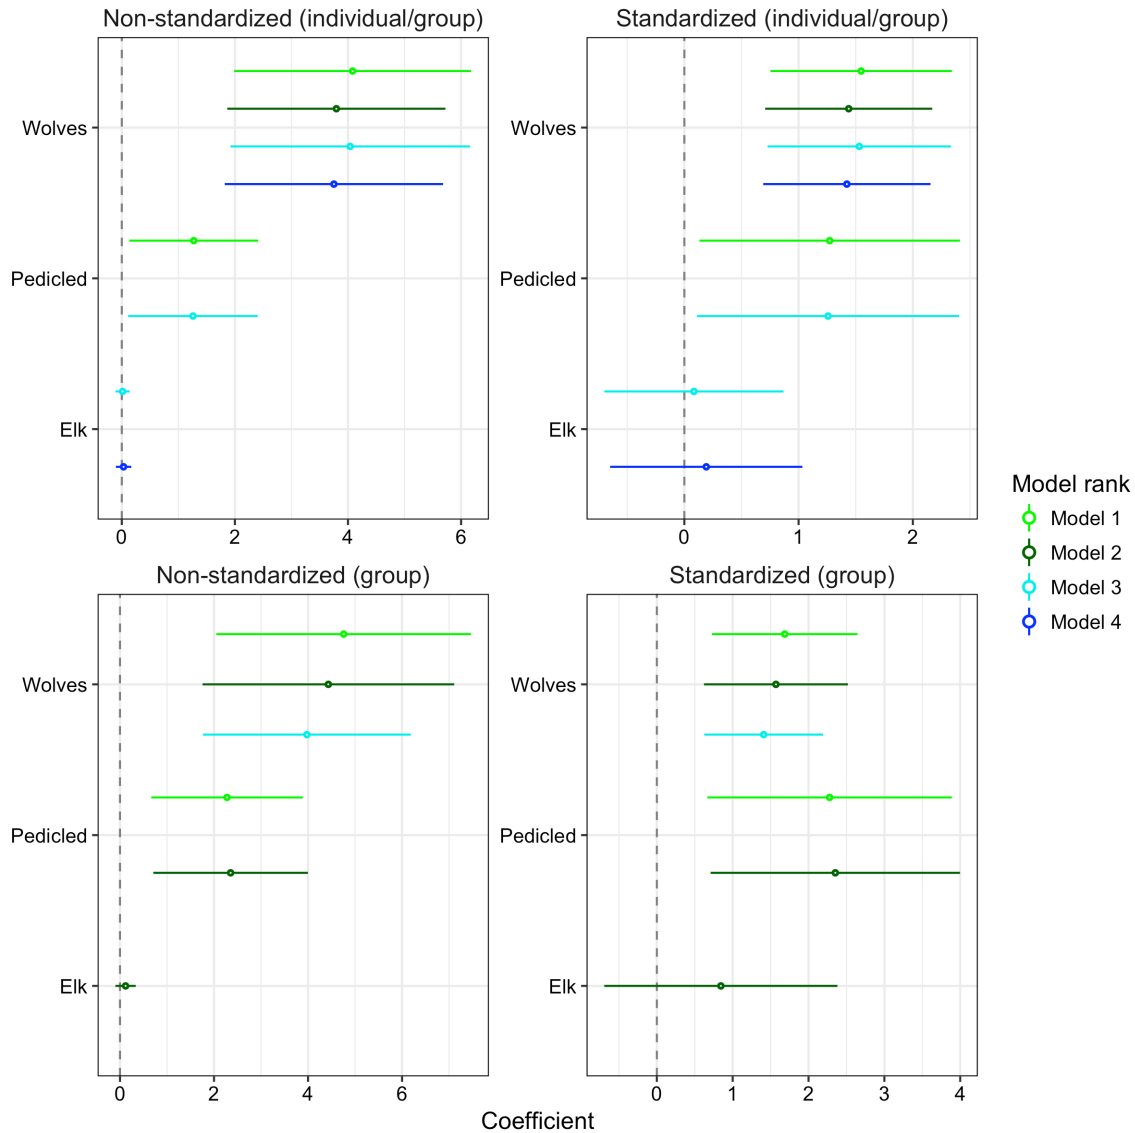

**Supplementary Figure 3. Beta coefficients for top models describing factors affecting the probability of attack given an encounter with male elk.** ‘Wolves’ represents wolf group size (log transformed), ‘Pedicled’ represents whether a pedicled individual(s) was present, and ‘Elk’ represents the number of elk. Panels display either non-standardized or standardized beta coefficients for models describing the likelihood that an encounter with solitary or  $\geq 2$  adult male elk included an attack (top row) and an encounter with  $\geq 2$  adult male elk included an attack (bottom row). Coefficients are displayed for models within 4  $\Delta AIC_c$  units of the top model (Supplementary Table 1). Error bars represent 85% confidence intervals. Model numbers identifying each model represent the model rank from Supplementary Table 1.

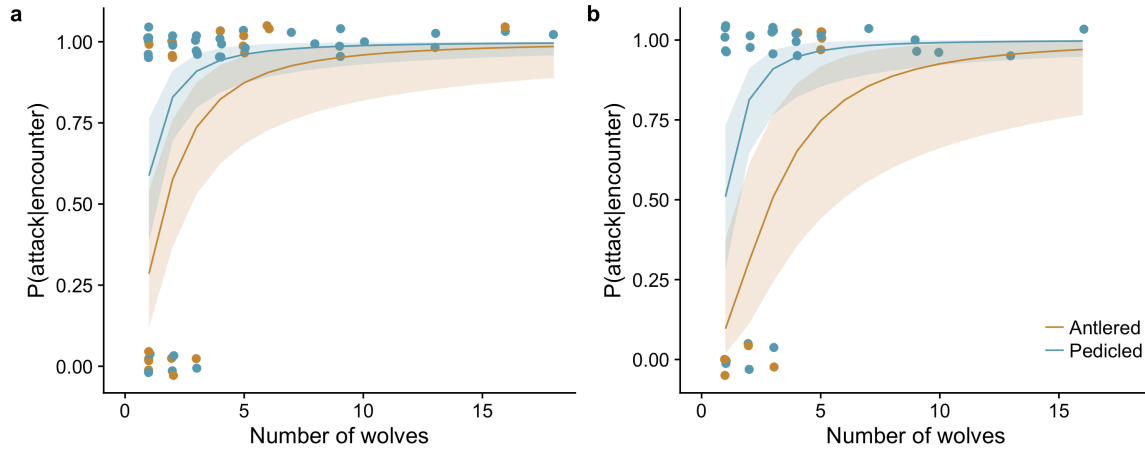

**Supplementary Figure 4. Predictions for top models describing factors affecting the probability of attack given an encounter with male elk.** Panels display predictions for the top model (Supplementary Table 1) describing the probability that wolves **a**, attacked solitary or groups of  $\geq 2$  adult male elk, and **b**, attacked groups of  $\geq 2$  adult male elk only. Shaded areas represent 85% confidence intervals.

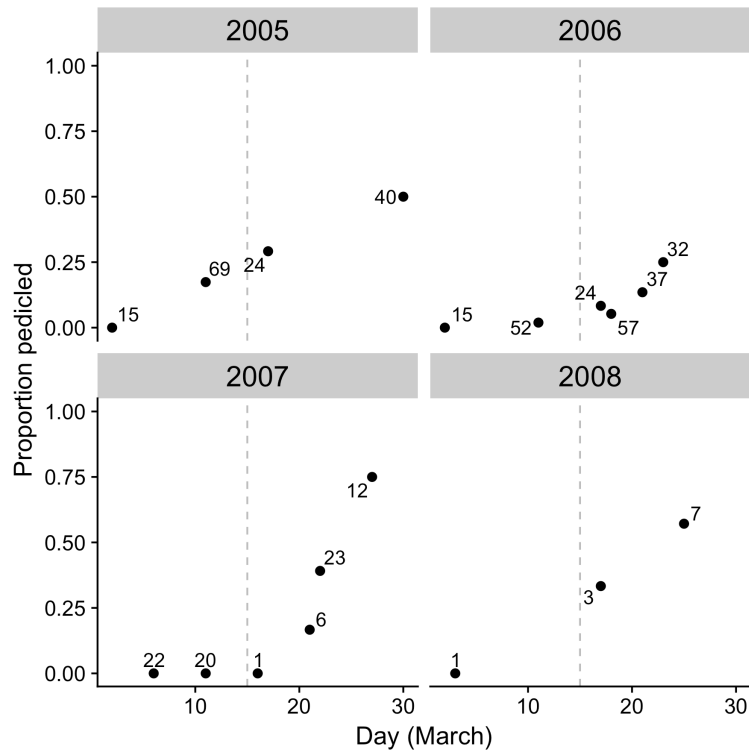

**Supplementary Figure 5. Proportion of male elk that had cast their antlers during each male elk antler classification survey (2005 – 2008).** Numbers indicate the number of individual male elk classified as pedicled or antlered during each survey. Dashed gray lines indicate the mid-point of the month that distinguishes ‘Early March’ from ‘Late March’.

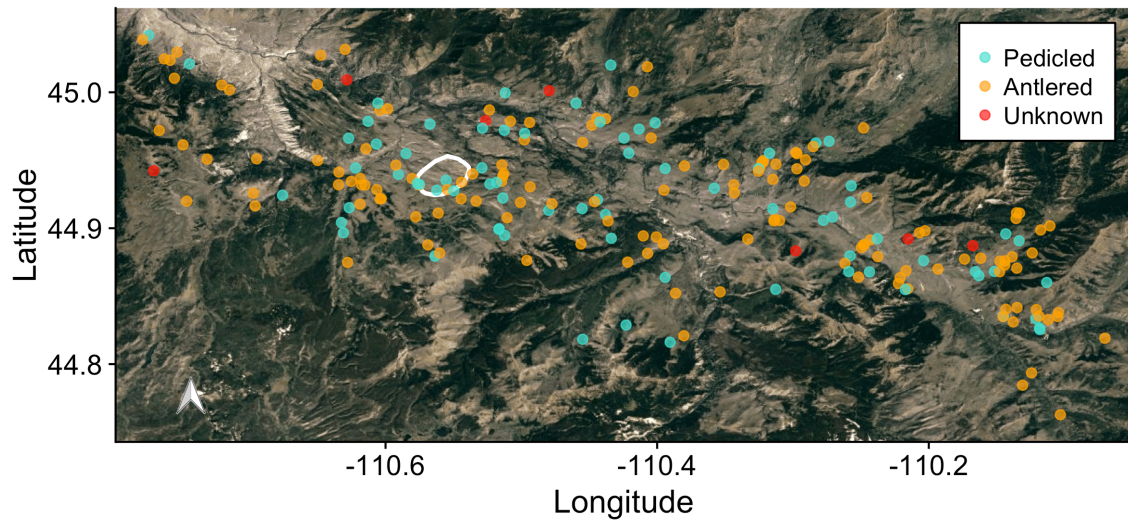

**Supplementary Figure 6. Geographic distribution of 223 wolf-killed adult male elk detected during March (2004 – 2016).** The white-lined polygon represents the 6.7 km<sup>2</sup> male elk classification survey unit (Supplementary Fig. 5).



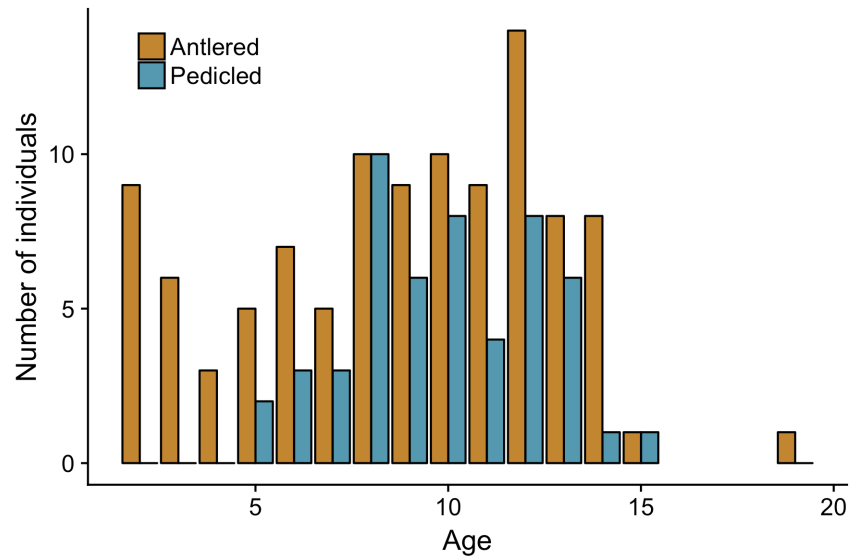

**Supplementary Figure 7. Age of wolf-killed adult male elk during March (2004 – 2016).** Ages are displayed for the 157 individuals where we determined both the individual's age and nutritional condition.

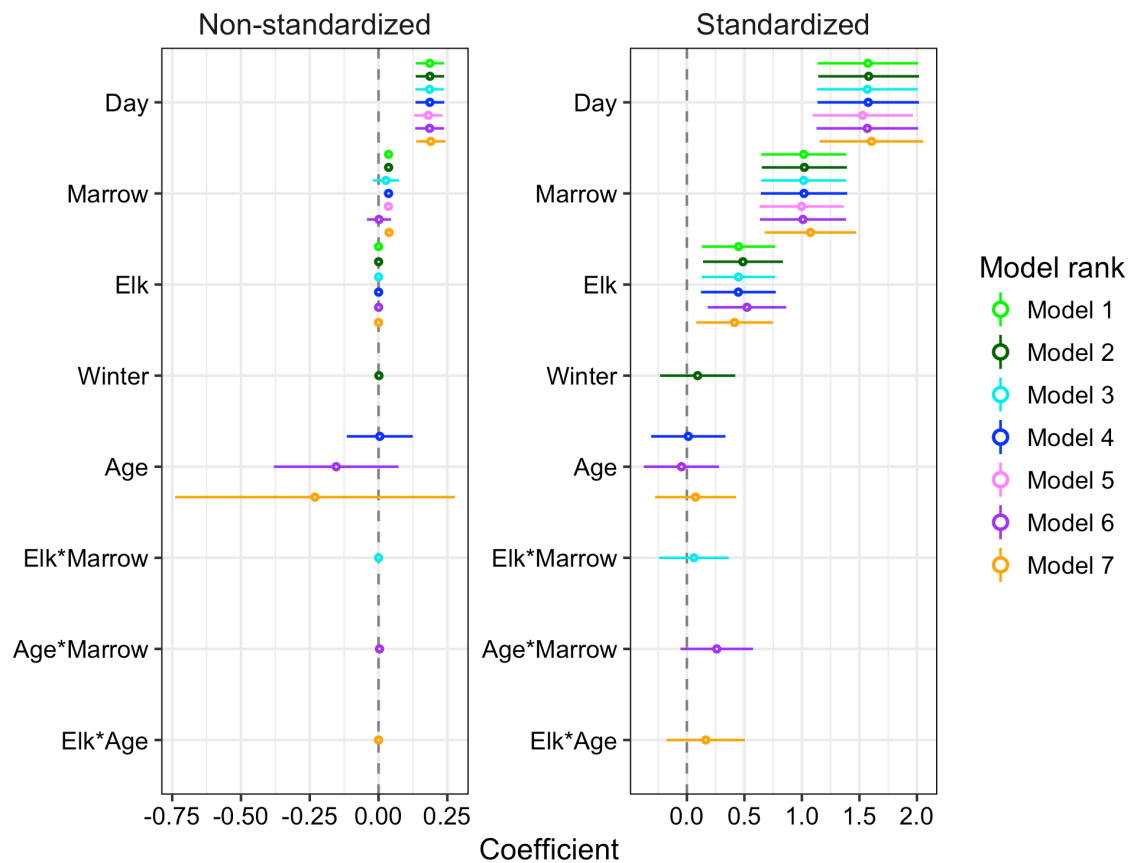

**Supplementary Figure 8. Beta coefficients for top models describing factors affecting the probability of a wolf-killed adult male elk ( $\geq 5$  years old) being a pedicled individual.** ‘Day’ represents the day in March, ‘Marrow’ represents elk femur marrow percent fat, ‘Elk’ represents elk abundance, ‘Winter’ represents winter severity, and ‘Age’ represents the elk’s age. Non-standardized and standardized beta coefficients are displayed for models within 4  $\Delta\text{AIC}_c$  units of the top model (Supplementary Table 3). Error bars represent 85% confidence intervals. Model numbers identifying each model represent the model rank from Supplementary Table 3.

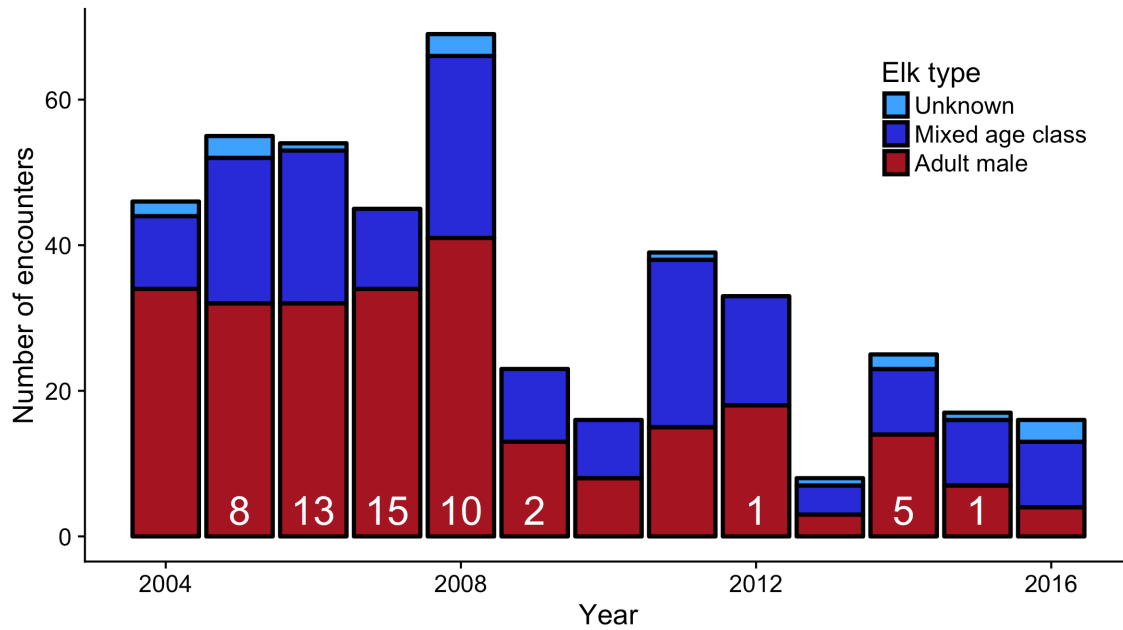

**Supplementary Figure 9. Number of observations of wolf-elk encounters during March (2004 – 2016).** White numbers indicate the number of encounters included in our analysis of how the presence of pedicled individual(s) affected the probability of wolves attacking male elk.

**a, Probability of attack given an encounter with male elk (groups or solitary animals)**

| <b>Model</b>                | <b>K</b> | <b>LL</b> | <b>AICc</b> | <b><math>\Delta</math>AICc</b> | <b><math>w_i</math></b> |
|-----------------------------|----------|-----------|-------------|--------------------------------|-------------------------|
| (1) pedicled + wolves       | 3        | -21.63    | 49.72       | 0.00                           | 0.42                    |
| (2) wolves                  | 2        | -22.97    | 50.17       | 0.45                           | 0.33                    |
| (3) pedicled + wolves + elk | 4        | -21.61    | 52.03       | 2.30                           | 0.13                    |
| (4) wolves + elk            | 3        | -22.91    | 52.29       | 2.57                           | 0.12                    |

**b, Probability of attack given an encounter with groups of  $\geq 2$  male elk**

| <b>Model</b>                | <b>K</b> | <b>LL</b> | <b>AICc</b> | <b><math>\Delta</math>AICc</b> | <b><math>w_i</math></b> |
|-----------------------------|----------|-----------|-------------|--------------------------------|-------------------------|
| (1) pedicled + wolves       | 3        | -14.41    | 35.54       | 0.00                           | 0.52                    |
| (2) pedicled + wolves + elk | 4        | -13.89    | 37.03       | 1.49                           | 0.25                    |
| (3) wolves                  | 2        | -16.92    | 38.18       | 2.65                           | 0.14                    |
| (4) wolves + elk            | 3        | -16.44    | 39.61       | 4.07                           | 0.07                    |

**Supplementary Table 1. Model selection results of factors affecting the probability of attack given an encounter with male elk.** We evaluated the effects of log-transformed wolf group size (wolves), the number of elk (elk), and whether elk groups contained pedicled individual(s) (pedicled). Panels identify the top models describing the probability that **a**, an encounter would include an attack for encounters with solitary or  $\geq 2$  adult male elk, and **b**, an encounter would include an attack for only encounters with  $\geq 2$  male elk. Models with a  $\Delta$ AIC<sub>c</sub> < 6 are displayed. Our ability to differentiate among the top models was limited by our relatively small sample size. Nonetheless, the number of wolves (wolves) and whether or not a pedicled individual was present (pedicled) were in the top model for **a** and **b**. See Supplementary Fig. 3 for non-standardized and standardized beta coefficient estimates for models within 4  $\Delta$ AIC<sub>c</sub> units of the top model.

| Year | Unknown | Pedicated | One Antler | Antlered |
|------|---------|-----------|------------|----------|
| 2004 | 3       | 4         | 0          | 18       |
| 2005 | 1       | 18        | 0          | 10       |
| 2006 | 0       | 1         | 0          | 12       |
| 2007 | 0       | 7         | 1          | 17       |
| 2008 | 1       | 12        | 1          | 20       |
| 2009 | 1       | 10        | 0          | 14       |
| 2010 | 0       | 2         | 0          | 10       |
| 2011 | 0       | 3         | 0          | 6        |
| 2012 | 0       | 4         | 1          | 8        |
| 2013 | 0       | 0         | 0          | 5        |
| 2014 | 1       | 2         | 0          | 4        |
| 2015 | 0       | 5         | 0          | 11       |
| 2016 | 0       | 4         | 0          | 6        |

**Supplementary Table 2. Antler condition for 223 wolf-killed adult male elk (2004 – 2016).**

| Model                             | K | LL     | AICc   | $\Delta AICc$ | $w_i$ |
|-----------------------------------|---|--------|--------|---------------|-------|
| day + marrow + elk                | 4 | -65.04 | 138.38 | 0.00          | 0.25  |
| day + marrow + elk + winter       | 5 | -64.96 | 140.36 | 1.98          | 0.09  |
| elk * marrow + day                | 5 | -65.00 | 140.45 | 2.07          | 0.09  |
| day + marrow + elk + age          | 5 | -65.04 | 140.53 | 2.15          | 0.09  |
| day + marrow                      | 3 | -67.22 | 140.61 | 2.23          | 0.08  |
| age * marrow + day + elk          | 6 | -64.33 | 141.29 | 2.91          | 0.06  |
| elk * age + day + marrow          | 6 | -64.80 | 142.23 | 3.85          | 0.04  |
| winter * marrow + day + elk       | 6 | -64.90 | 142.44 | 4.06          | 0.03  |
| elk * marrow + day + winter       | 6 | -64.93 | 142.50 | 4.11          | 0.03  |
| day + marrow + age                | 4 | -67.10 | 142.51 | 4.12          | 0.03  |
| day + marrow + elk + winter + age | 6 | -64.95 | 142.54 | 4.16          | 0.03  |
| day + marrow + winter             | 4 | -67.13 | 142.57 | 4.19          | 0.03  |
| elk * marrow + day + age          | 6 | -64.99 | 142.62 | 4.24          | 0.03  |
| age * marrow + day + elk + winter | 7 | -64.17 | 143.20 | 4.82          | 0.02  |
| age * marrow + day                | 5 | -66.91 | 144.28 | 5.89          | 0.01  |
| elk * age + day + marrow + winter | 7 | -64.71 | 144.28 | 5.90          | 0.01  |

**Supplementary Table 3. Model selection results of factors affecting the probability of a wolf-killed adult male elk ( $\geq 5$  years old) being a pedicled individual.** We evaluated the effects of day in March (day), elk age (age), elk femur marrow percent fat (marrow), elk abundance (elk), and winter severity (winter). Models were developed using 139 wolf-killed male elk detected from 2004 – 2016. Models with a  $\Delta AIC_c < 6$  are displayed. See Supplementary Fig. 8 for non-standardized and standardized beta coefficient estimates for models within 4  $\Delta AIC_c$  units of the top model.

## References

- 1 Smith, D. W., Drummer, T. D., Murphy, K. M., Guernsey, D. S. & Evans, S. B. Winter prey selection and estimation of wolf kill rates in Yellowstone National Park, 1995–2000. *Journal of Wildlife Management* **68**, 153-166 (2004).
- 2 Martin, H. W. *et al.* Factors affecting gray wolf (*Canis lupus*) encounter rate with elk (*Cervus elaphus*) in Yellowstone National Park. *Canadian Journal of Zoology*, doi:10.1139/cjz-2017-0220 (2018).
- 3 Kamischke, E. *Estimation of Kill Rates by Yellowstone Wolves*, Michigan Technological University, (2007).
- 4 Tallian, A. *et al.* Predator foraging response to a resurgent dangerous prey. *Functional Ecology* **31**, 1418-1429 (2017).
